# Supplementary material for: Umbilical cord characteristics and their association with adverse pregnancy outcomes: A systematic review and meta-analysis
Source: PLoS One. 2020 Sep 24;15(9):e0239630. doi: 10.1371/journal.pone.0239630 (PMC7514048; doi:10.1371/journal.pone.0239630)
Supplement: S1 Data — (XLSX) [file pone.0239630.s003.xlsx]

## Sheet: Normal characteristics
Umbilical cord length																				Coiling index
First author	Year	Mean	SD	n	x*n	sd*n	Gestation	Notes												First author	Year	Mean	SD	Total number	x*n	SD*n
Abdallah	2018	568.792	91.9127	417	237186	38327.6	39 average	NC and control group combined; NC cords longer												Adesina	2014	0.02	0.01	428	8.56	4.28					Adesina
Adesina	2014	526.87	115.15	428	225500	49284.2	30 to 44	10th centile given as 400, 90th as 690												Adesina	2018	0.21	0.099	436	91.56	43.164					Bindu sharma
Adesina	2018	527	115	436	229772	50140	39 average													Bindu	2012	0.41	0.3	454	186.14	136.2					Chholak
Agboola	1978	574.8	120.4	602	346030	72480.8	39 average													Chholak	2017	0.24	0.09	500	120	45					Chitra
Balkawade	2012	638.7	156.9	1000	638700	156900	after 37	cord length related to knots and prolapse												Chitra	2012	0.24	0.09	1000	240	90					Devaru
Begum	2011	501.8	82.6	1494	749689	123404	24-40													van Dijk	2002	0.17	0.009	122	20.74	1.098					De Laat
Blickstein	1987	595	130	108	64260	14040	39 average	case control for TN												de Laat	2006	0.16	0.1	885	141.6	88.5					De Laat
Chaurasia	1979	454	126	528	239712	66528	term	10cm of fetal end of cord left with newborn												de Laat	2006	0.3	0.09	45	13.5	4.05					Ercal
Chitra	2012	528.7	134.9	1000	528700	134900	after 28	cut 5cm from insertion												Degani	1995	0.28	0.08	45	12.6	3.6					Ezimokhai
de Laat	2006	525	166	885	464625	146910	unknown													Degani	1995	0.44	0.11	45	19.8	4.95					gaikwad
de Laat	2007	392	187	565	221480	105655	unknown													Degani	2001	0.44	0.11	124	54.56	13.64					jessop
Degani	1995	416	152	45	18720	6840	38-41													el Behery	2011	0.35	0.08	124	43.4	9.92					jo
el Behery	2011	583	96	124	72292	11904	after 24													Gaikwad	2016	0.19	no SD								Kashanian
Ercal	1996	568	103	147	83496	15141	39 average													Jessop	2014	0.2	0.09	1082	216.4	97.38					ndolo
Ghezzi	2001	580	95	396	229680	37620	39.7 average													Kashanian	2006	0.25	0.09	699	174.75	62.91					pathak
Jaya	1995	506.5	30	3703	1.87557e+06	111090	unknown													Mittal	2015	0.361	0.073	200	72.2	14.6					el behery
Jessop	2014	430	130	1082	465260	140660	unknown													Pathak	2010	0.2	0.09	854	170.8	76.86					degani
LaMonica	2008	224	37	166	37184	6142	>37													Qin	2002	0.2	0.1	374	74.8	37.4					degani
Lolis	1998	561	93		0	0														Rana	1995	0.19	0.1	635	120.65	63.5
Malpas	1964	610	40	538	328180	21520	Term													Sahoo	2015	mean antenatal UCI was 0.4, SD not given
Naeye	1985	525	112	3153	1655325	353136	36 to 37													Strong	1994	0.21	0.07	100	21	7
Naeye	1985	574	126	10083	5787642	1270458	38 to 39													Strong	1996	0.18	0.09	63	11.34	5.67
Naeye	1985	596	126	13841	8249236	1743966	40 to 41													Strong	1996	0.21	0.07	137	28.77	9.59
Narang	2014	482	43.1	50	24100	2155	unknown	no NC												Tripathy	2014	0.2	0.08	102	20.4	8.16
Narang	2014	533.2	65.3	50	26660	3265	unknown	single NC
Narang	2014	528	82	50	26400	4100	unknown	multiple NC
Nnatu	1960	583.9	120.2	661	385958	79452.2	unknown
Nkwabong	2014	683	132	114	77862	15048	39.5	NC
Nkwabong	2014	507	92	228	115596	20976	39.2	no NC
Ohno	2016	562.8	112.9	160	90048	18064	39.6	normocoiled; abnormally coiled cords were longer but NS
Pathak	2010	415	142	854	354410	121268	39.5																	7051
Purola	1968	590	120	1713	1010670	205560	unknown
Qin	2002	470	102	528	248160	53856	39.1
Rana	1995	544	123	635	345440	78105	38.3
Shiva Kumar	2017	660	100	1000	660000	100000	>37
Sornes	1989	576.6	12.44	613	353456	7625.72	>28	Para 1
Sornes	1989	583.1	12.3	613	357440	7539.9	>28	para 2
Sornes	1989	596.4	12.83	613	365593	7864.79	>28	para 3
Stefos	2003	569	93.8	403	229307	37801.4	unknown	Para 1+2
Stefos	2003	644	113.5	131	84364	14868.5	unknown	Para 3+
Suzuki	2012	562	117	11029	6198298	1290393	38.5
Tapasvi	2017	491	102.1	100	49100	10210	37-42	At birth
Tripathy	2014	531	111	102	54162	11322	>28
van Dijk	2002	536	143	122	65392	17446	39.9	At birth
Walker	1960	542.1	146	177	95951.7	25842	39
Wu	1996	557.5	98.584	1087	606002	107161
Wu	1996	564.8	97.2	574			>38	Boys
Wu	1996	549.4	93.5	513			>38	Girls
Yamamoto	2016	566	not given - authors emailed	22693	12844238					Yamamoto	2016	566	not given - authors emailed	22693	12844238
data for 39 weeks gestation
author	year	mean	sd	n	x*n	sd*n
Abdallah	2018	568.792	91.9127	417	237186	38327.6
Adesina	2018	527	115	436	229772	50140
Blickstein	1987	595	130	108	64260	14040
Ghezzi	2001	580	95	396	229680	37620
Naeye	1985	574	126	10083	5787642	1270458
Nkwabong	2014	683	132	114	77862	15048
Nkwabong	2014	507	92	228	115596	20976
Ohno	2016	562.8	112.9	160	90048	18064
Pathak	2010	415	142	854	354410	121268
Qin	2002	470	102	528	248160	53856
van Dijk	2002	536	143	122	65392	17446
Walker	1960	542.1	146	177	95951.7	25842

## Sheet: Nuchal cord incidence
Nuchal cord
First author	Year	Definition	Measurement	num	denom		Firstauthor	Year			Gestation	num	denom				First author	Year	Definition	Definition	Measured	num	denom		First author	Year	Definition	Definition	Measured	num	denom
Abdallah	2018	3/4 sides of neck	At delivery	100	455		Abdallah	2018	3/4 sides of neck	Ultrasound	>37w	92	417				Aksoy	2003	1	Single	At delivery	18	68		Aksoy	2003	1	Single	At delivery	18	68
Adesina	2014	Nuchal cord	At delivery	33	428		Aksoy	2003		Ultrasound	mean 31	22	68												Aksoy	2003	2	Multiple	At delivery	1	68
Adinma	1990	Neck alone	At delivery	192	1030		Assimakopoulos	2005	Around neck	Ultrasound	37-39w	144	352				Aksoy	2003	2	Multiple	At delivery	1	68		Balkawade	2012	1	Single	At delivery	124	1000
Aibar	2012	All	At delivery	1310	29530		Clapp	2003		Ultrasound	36-38w	24	84				Balkawade	2012	1	Single	At delivery	124	1000		Balkawade	2012	2	Multiple	At delivery	83	1000
Aksoy	2003	All	At delivery	19	68		Collins	2000		Ultrasound	20-30w	184	1064				Balkawade	2012	2	Multiple	At delivery	67	1000		Begum	2011	1	Single	At delivery	133	1646
Assimakopoulos	2005	Around neck	At delivery	142	352		Ghosh	2008		Ultrasound	>42w	69	202				Balkawade	2012	3	Multiple	At delivery	13	1000		Begum	2011	2+	Multiple	At delivery	19	1646
Aviram	2016	All	At delivery	856	37856		Hanaoka	2002		Ultrasound	36-41w	35	120				Balkawade	2012	4	Multiple	At delivery	2	1000		Bernad	2012	1	Single	At delivery	353	5025
Balkawade	2012	All	At delivery	207	1000		Kesrouani	2017	All	Ultrasound	mean 21-23w	43	897				Balkawade	2012	5	Multiple	At delivery	1	1000		Bernad	2012	2	Multiple	At delivery	36	5025
Bartling	1980		At delivery	38	115		Lal	2007	All	Ultrasound	36-38w	53	200				Begum	2011	1	Single	At delivery	133	1646		Carey	2000	1	Single	At delivery	3250	13757
Begum	2011	All	At delivery	152	1646		Markov	2007		Ultrasound	37-42w	36	86				Begum	2011	2+	Multiple	At delivery	19	1646		Carey	2000	2+	Multiple	At delivery	504	13757
Bernad	2012	All	At delivery	397	5025		Peregrine	2005	All	Ultrasound	>36w	62	289				Bernad	2012	1	Single	At delivery	353	5025		Dhar	1995	1	Single	At delivery	133	3133
Carey	2000	All	At delivery	3754	13757		Poljak	1989	All	Ultrasound	Term	17	100				Bernad	2012	2	Multiple	At delivery	28	5025		Dhar	1995	2	Multiple	At delivery	47	3133
Clapp	2003		At delivery	31	84		Qin	2000	All	Ultrasound	36-42w	76	180				Bernad	2012	3	Multiple	At delivery	8	5025		Gupta	2018	1	Single	At delivery	119	700
Collins	2000		At delivery	137	1064		Romero Gutierrez	2000		Ultrasound	Term	57	132				Carey	2000	1	Single	At delivery	3250	13757		Gupta	2018	2	Multiple	At delivery	45	700
D'Antona	1995		At delivery	11	37												Carey	2000	2+	Multiple	At delivery	504	13757		Hanaoka	2002	1	Single	At delivery	30	120
Dhar	1995	All	At delivery	180	3133												Dhar	1995	1	Single	At delivery	133	3133		Hanaoka	2002	2	Multiple	At delivery	5	120
Ertuğrul	2013	All	At delivery	184	1784								4191				Dhar	1995	2	Multiple	At delivery	37	3133		Hashimoto	2004	1	Single	At delivery	43	167
Gupta	2018	All	At delivery	164	700												Dhar	1995	3	Multiple	At delivery	9	3133		Hashimoto	2004	2	Multiple	At delivery	4	167
Hanaoka	2002	All	At delivery	35	120		ULTRASOUND ONLY										Dhar	1995	4	Multiple	At delivery	1	3133		Jauniaux	1995	All	All	At delivery	832	2650
Hashimoto	2003	All	At delivery	47	167		Abdallah	2018	3/4 sides of neck	Ultrasound	92	417					Gupta	2018	1	Single	At delivery	119	700		Joshi	2017	1	Single	At delivery	63	506
Henry	2013	All	At delivery	61845	219337		Aksoy	2003	encirclement of fetal neck	Ultrasound	22	68					Gupta	2018	2	Multiple	At delivery	38	700		Joshi	2017	2	Multiple	At delivery	37	506
Hershkovitz	2001		At delivery	11294	69139		Assimakopoulos	2005	Around neck	Ultrasound	144	352					Gupta	2018	3	Multiple	At delivery	7	700		Kesrouani	2017	2+	Multiple	At delivery	5	897
Jauniaux	1995	All	At delivery	832	2650		Collins	2000		Ultrasound	184	1064					Hanaoka	2002	1	Single	At delivery	30	120		Kesrouani	2017	1	Single	At delivery	38	897
Joshi	2017	All	At delivery	100	506		Ghosh	2008		Ultrasound	69	202					Hanaoka	2002	2	Multiple	At delivery	4	120		Kong	2015	1	Single	At delivery	1219	5166
Kahana	2014		Unknown	18046	121227		Hanaoka	2002		Ultrasound	29	120					Hanaoka	2002	3	Multiple	At delivery	1	120		Kong	2015	2	Multiple	At delivery	166	5166
Kobayashi	2015	All	At delivery	1451	6307		Kesrouani	2017	All	Ultrasound	43	897					Hashimoto	2004	1	Single	At delivery	43	167		Kumar	2017	1	Single	At delivery	124	1000
Kong	2015	All	At delivery	1390	5166		Lal	2007		Ultrasound	53	200	36-38w				Hashimoto	2004	2	Multiple	At delivery	4	167		Kumar	2017	2	Multiple	At delivery	96	1000
Kumar	2017	All	At delivery	220	1000		Markov	2007		Ultrasound	26	86					Joshi	2017	1	Single	At delivery	63	506		Larson	1995	1	Single	At delivery	2191	8565
Lal	2007	All	At delivery	56	200		Peregrine	2005	All	Ultrasound	62	289					Joshi	2017	2	Multiple	At delivery	28	506		Larson	1995	2+	Multiple	At delivery	326	8565
Larson	1995	All	At delivery	2517	8565		Poljak	1989	All	Ultrasound	17	100					Joshi	2017	3	Multiple	At delivery	6	506		Larson	1997	1	Single	At delivery	3246	13875
Larson	1997	All	At delivery	3758	13875		Qin	2000			76	180					Joshi	2017	4	Multiple	At delivery	3	506		Larson	1997	2+	Multiple	At delivery	512	13875
Lipitz	1993	All	At delivery	152	456		Romero Gutierrez	2000	All	Ultrasound	57	132					Kesrouani	2017	2+	Multiple	At delivery	5	897		Lipitz	1993	2+ loops	Multiple	At delivery	1016	12241
Mastrobattista	2005	All	At delivery	775	4426						874	4107					Kesrouani	2017	1	Single	At delivery	38	897		Lipitz	1993	1	Single	At delivery	105	456
McLennan	1988	all	At delivery	153	1115												Kong	2015	1	Single	At delivery	1219	5166		Lipitz	1993	2	Multiple	At delivery	47	456
Miser	1992	All	At delivery	167	706												Kong	2015	2	Multiple	At delivery	146	5166		Mastrobattista	2005	1	Single	At delivery	691	4426
Nkwabong	2018	All	At delivery	121	2015												Kong	2015	3+	Multiple	At delivery	20	5166		Mastrobattista	2005	2+	Multiple	At delivery	84	4426
Ogueh	2006	All (at least one loop)	At delivery	13717	57853												Kumar	2017	1	Single	At delivery	124	1000		McLennan	1988	1	Single	At delivery	135	1115
Osak	1997	All	At delivery	2699	10509												Kumar	2017	2	Multiple	At delivery	78	1000		McLennan	1988	2	Multiple	At delivery	18	1115
Peregrine	2005	All	At delivery	52	289												Kumar	2017	3	Multiple	At delivery	15	1000		Miser	1992	1	Single	At delivery	153	706
Purola	1968	All	At delivery	431	1980												Kumar	2017	4	Multiple	At delivery	2	1000		Miser	1992	2	Multiple	At delivery	14	706
Qin	2000	All	At delivery	64	180												Kumar	2017	5	Multiple	At delivery	1	1000		Nwakbong	2018	1	Single	At delivery	61	2015
Rayburn	1981	All	At delivery	130	536												Larson	1995	1	Single	At delivery	2191	8565		Nwakbong	2018	2+	Multiple	At delivery	53	2015
Schaffer	2005	All	At delivery	3226	9574												Larson	1995	2+	Multiple	At delivery	326	8565		Peregrine	2005	1	Single	At delivery	42	289
Sheiner	2006	All	At birth	24392	166318												Larson	1997	1	Single	At delivery	3246	13875		Peregrine	2005	2	Multiple	At delivery	10	289
Shrestha	2007	All	At birth	117	512												Larson	1997	2+	Multiple	At delivery	512	13875		Purola	1969	1	Single	At delivery	354	1980
Singh	2008	All	At birth	65	350												Lipitz	1993	2+ loops	Multiple	At delivery	1016	12241		Purola	1970	2	Multiple	At delivery	77	1980
Sinnathuray	1965	All	At birth	1278	3917												Lipitz	1993	1	Single	At delivery	105	456		Schaffer	2005	1	Single	At delivery	2671	9574
Strong	1996	All	At birth	63	200												Lipitz	1993	2	Multiple	At delivery	27	456		Schaffer	2005	2+ loops	Multiple	At delivery	555	9574
Tamrakar	2013	All	At birth	289	4508												Lipitz	1993	3+	Multiple	At delivery	20	456		Shrestha	2007	1	Single	At birth	97	512
Vintzileos	1992	All	At birth	87	520												Mastrobattista	2005	1	Single	At delivery	691	4426		Shrestha	2007	2	Multiple	At birth	20	512
Wang	2016	All	At birth	697	1749												Mastrobattista	2005	2+	Multiple	At delivery	84	4426		Singh	2008	1	Single	At birth	61	350
Weiner	2015	All	At delivery	245	1060												McLennan	1988	1	Single	At delivery	135	1115		Singh	2008	2	Multiple	At birth	7	350
Zahoor	2013	All	At delivery	205	1776												McLennan	1988	2	Multiple	At delivery	14	1115		Suzuki	2012	2+ loops	Multiple	At birth	468	10453
					816872												McLennan	1988	3	Multiple	At delivery	4	1115		Tamrakar	2013	1	Single	At birth	151	4219
																	Miser	1992	1	Single	At delivery	153	706		Tamrakar	2013	2+	Multiple	At birth	138	4219
																	Miser	1992	2	Multiple	At delivery	12	706		Weiner	2015	1	Single	At delivery	133	1060
																	Miser	1992	3	Multiple	At delivery	2	706		Weiner	2015	2+	Multiple	At delivery	112	1060
																	Nkwabong	2018	1	Single	At delivery	61	2015		Zahoor	2013	1	Single	At delivery	164	1776
																	Nkwabong	2018	2+	Multiple	At delivery	53	2015		Zahoor	2013	2	Multiple	At delivery	41	1776
																	Peregrine	2005	1	Single	At delivery	42	289
																	Peregrine	2005	2	Multiple	At delivery	8	289
																	Peregrine	2005	3	Multiple	At delivery	2	289
Begum	2011	Loose	At delivery	46	1646		loose total		228199								Purola	1969	1	Single	At delivery	354	1980
Begum	2011	Tight	At delivery	106	1646		tight total		285546								Purola	1970	2	Multiple	At delivery	65	1980				single loop pregnancies			15902	84103
Dhar	1995	Tight	At delivery	70	3133												Purola	1971	3	Multiple	At delivery	12	1980				multiple loop pregnancies			105935
Dhar	1995	Loose	At delivery	108	3133												Qin	2000	1	Single	At delivery	61	180
Gupta	2018	Loose	At delivery	99	700												Qin	2000	2+	Multiple	At delivery	3	180
Gupta	2018	Tight	At delivery	65	700												Schaffer	2005	1	Single	At delivery	2671	9574							190038
Henry	2013	Loose	At delivery	47364	219337												Schaffer	2005	2+ loops	Multiple	At delivery	555	9574
Henry	2013	Tight	At delivery	14481	219337												Shrestha	2007	1	Single	At birth	97	512
Joshi	2017	Tight	At delivery	47	506												Shrestha	2007	2	Multiple	At birth	18	512
Joshi	2017	Loose	At delivery	53	506												Shrestha	2007	3	Multiple	At birth	1	512
Nkwabong	2018	Tight	At delivery	51	2015												Shrestha	2007	4	Multiple	At birth	1	512
Nkwabong	2018	Loose	At delivery	63	2015												Singh	2008	1	Single	At birth	61	350
Ogueh	2006	Tight	At delivery	3027	57853												Singh	2008	2	Multiple	At birth	5	350
Shrestha	2007	Tight	At birth	28	512												Singh	2008	3	Multiple	At birth	2	350
Shrestha	2007	Loose	At birth	89	512												Suzuki	2012	2+ loops	Multiple	At birth	468	10453
Singh	2008	Tight	At birth	48	350												Tamrakar	2013	1	Single	At delivery	151	4219
Singh	2008	Loose	At birth	17	350												Tamrakar	2013	2+	Multiple	At delivery	138	4219
																	Weiner	2015	1	Single	At delivery	133	1060
																	Weiner	2015	2+	Multiple	At delivery	112	1060
																	Zahoor	2013	1	Single	At delivery	164	1776
																	Zahoor	2013	2	Multiple	At delivery	37	1776
																	Zahoor	2013	3+	Multiple	At delivery	4	1776
																				total	106521	30 studies
Mean
0.16	0.03	0.04
0.03	0.01	0.01
0.01	0.01	0.01

## Sheet: US accuracy
NUCHAL CORD		TP	FP	FN	TN	Gestation
Abdallah	2018	83	11	9	314	Active labour >6cm	colour doppler
Akkaya	2017	202	48	16	234	Early labour	colour doppler
Aksoy	2003	18	4	1	45	24-41w	colour doppler
Assimakopoulos	2005	121	23	21	187	37-39	2d ultrasounds
Clapp	2003	9	15	22	38	36-38w	colour doppler	if we use total measurements then 50/84 US and 31/84 at delivery but can we know which of these were detected?
Gonzalez- Quintero	2004	44	74	17	98	second and third trimester	colour doppler
Hanaoka	2002	24	11	17	68	36-41w	2D
Hanaoka	2002	25	10	15	70	36-41w	3D
Hanaoka	2002	29	6	19	66	36-41w	colour doppler
Lal	2007	45	8	11	136	36-38w	2D & colour
Markov	2007	36	8	16	26	37-42	3D
Peregrine	2005	18	44	34	193	Prior to IoL	colour doppler
Qin	2000	62	14	2	102	Labour 36-42w
Romero Gutierrez	2000	46	11	4	71	37-42w	colour doppler

## Sheet: Nuchal cord outcomes
First author	Year		Definition		Nuchal cord	CASE EVENTS	CASE NON EVENTS	CONTROL EVENTS	CONTROL NON EVENTS
Abdallah	2018	SB	Stillbirth	3/4 sides of neck	At delivery	0	92	0	325
Adinma	1990	SB	Fetal loss	All	At delivery	8	197	1	824
Balsak	2017	SB	IUFD	All	Ultrasound	3	474	18	1025
Carey	2000	SB	All	All	At delivery	26	3728	72	9931
Carey	2000	SB	Intrapartum	All	At delivery	3	3751	11	9992
Carey	2000	SB	Antepartum	All	At delivery	23	3731	61	9942
Carey	2000	SB	All	Single	At delivery	21	3229	77	10430
Carey	2000	SB	All	Multiple	At delivery	5	499	93	13160
Carey	2000	SB	Antepartum	Single	At delivery	18	3232	66	10441
Carey	2000	SB	Antepartum	Multiple	At delivery	5	499	79	13174
Carey	2000	SB	Intrapartum	Single loop	At delivery	3	3247	11	10496
Carey	2000	SB	Intrapartum	Multiple	At delivery	0	504	14	13239
Collins	2000	SB	Stillbirth >28w	All	At delivery	3	134	1	926
Ghosh	2008	SB	Stillbirth	All	Ultrasound	1	68	0	133
Gonzalez-Quintero	2003	SB	IUFD	All	Ultrasound	1	117	1	114
Jauniaux	1995	SB	IUFD	All	At delivery	2	548	0	550
Kong	2015	SB	IUFD	All	At delivery	3	1259	11	3893
Kong	2015	SB	IUFD	Single	At delivery	3	1216	11	3936
Kong	2015	SB	IUFD	Multiple	At delivery	0	171	14	4981
Larson	1995	SB	Intrapartum	All	At delivery	0	2517	2	6046
Larson	1995	SB	Intrapartum	Single	At delivery	0	2191	2	6372
Larson	1995	SB	Intrapartum	Multiple	At delivery	0	326	2	8237
Larson	1997	SB	Antepartum	All	At delivery	12	2365	57	4826
Larson	1997	SB	Before admission	All	At delivery	23	3735	117	10000
McLennan	1988	SB	Stillbirth	All	At delivery	0	158	7	950
McLennan	1988	SB	Stillbirth	Single	At delivery	0	135	7	973
McLennan	1988	SB	Stillbirth	Multiple	At delivery	0	23	7	1085
Miser	1992	SB	Stillbirth	All	At delivery	0	167	1	538
Miser	1992	SB	Stillbirth	Tight	At delivery	0	38	1	581
Miser	1992	SB	Stillbirth	Loose	At delivery	0	43	1	576
Miser	1992	SB	Stillbirth	Single	At delivery	0	153	1	552
Miser	1992	SB	Stillbirth	Multiple	At delivery	0	14	1	691
Onderoglu	2008	SB	Stillbirth	All	At delivery	1	159	0	160
Onderoglu	2008	SB	Stillbirth	Single	At delivery	0	128	1	191
Onderoglu	2008	SB	Stillbirth	Multiple	At delivery	1	31	0	288
Tantbirojn	2009	SB	Stillbirth	All	At delivery	7	52	34	448
Single and multiple loops for stillbirth
Author	Year			Loops		Quality assessment	caseevents	casenonevents	controlevents
Carey	2000	SB	All	One v none	At delivery	Fair	21	3229	72
Carey	2000	SB	All	Multiple v none	At delivery	Fair	5	499	72
Carey	2000	SB	All	Multiple v all	At delivery	Fair	5	499	93
Kong	2015	SB	IUFD	One v none	At delivery	Fair	3	1216	11
Kong	2015	SB	IUFD	Multiple v none	At delivery	Fair	0	171	11
Kong	2015	SB	IUFD	Multiple v all	At delivery	Fair	0	171	14
Larson	1995	SB	Intrapartum	One v none	At delivery	Good	0	2191	2
Larson	1995	SB	Intrapartum	Multiple v none	At delivery	Good	0	326	2
Larson	1995	SB	Intrapartum	Multiple v all	At delivery	Good	0	326	2
McLennan	1988	SB	Stillbirth	One v none	At delivery	Fair	0	135	7
McLennan	1988	SB	Stillbirth	Multiple v none	At delivery	Fair	0	23	7
McLennan	1988	SB	Stillbirth	Multiple v all	At delivery	Fair	0	23	7
Miser	1992	SB	Stillbirth	One v none	At delivery	Fair	0	153	1
Miser	1992	SB	Stillbirth	Multiple v none	At delivery	Fair	0	14	1
Miser	1992	SB	Stillbirth	Multiple v all	At delivery	Fair	0	14	1
Onderoglu	2008	SB	Stillbirth	One v none	At delivery	Good	0	160	0
Onderoglu	2008	SB	Stillbirth	Multiple v none	At delivery	Good	1	31	0
Onderoglu	2008	SB	Stillbirth	Multiple v all	At delivery	Good	1	31	0
Abdallah	2018	CS	3/4 sides of neck	All	At delivery	21	71	52	273
Akkaya	2017	EmCS	not stated	All	At delivery	19	99	8	182
Alnakash	2018	CS	3/4 sides of neck	All	At delivery	16	59	7	68
Alnakash	2018	CS	NC	Tight	At delivery	6	1	17	126
Alnakash	2018	CS	NC	Loose	At delivery	10	58	13	69
Assimakopoulos	2005	CS	NC	All	Ultrasound	13	131	5	203
Balsak	2017	CS	NC	All	Ultrasound	152	325	301	742
Balsak	2017	CSFD	NC	All	Ultrasound	22	455	30	1013
Begum	2011	CS	NC	All	At delivery	21	131	459	1035
Begum	2011	CS	NC	Tight	At delivery	17	89	463	1077
Begum	2011	CS	NC	Loose	At delivery	4	42	480	1120
Begum	2011	CS	NC	Single	At delivery	14	119	466	1047
Begum	2011	CS	NC	Multiple	At delivery	7	12	473	1154
Dhar	1995	LsCS for FD	cord around neck	All	At delivery	18	160	17	339
Dhar	1995	LsCS for FD	NC	Tight	At delivery	11	59	24	440
Dhar	1995	LsCS for FD	NC	Loose	At delivery	7	101	28	398
Ghosh	2008	CS	cord around neck	All	Ultrasound	15	54	19	114
Gonzalez-Quintero	2003	CS for FHR	cord around neck	All	Ultrasound	32	86	29	86
Gupta	2018	CS	NC	All	At delivery	53	111	138	398
Gupta	2018	CS	NC	Tight	At delivery	30	35	161	474
Gupta	2018	CS	NC	Loose	At delivery	23	67	168	442
Jauniaux	1995	CS	cord around neck	All	At delivery	51	499	29	521
Jauniaux	1995	CS	NC	Single	At delivery	18	267	62	753
Jauniaux	1995	CS	NC	Multiple	At delivery	33	232	47	788
Kobayashi	2015	CS	NC	All	At delivery	114	1337	325	4408
Kong	2015	EmCS	NC	All	At delivery	124	1138	457	2685
Kong	2015	EmCS	NC	Single	At delivery	98	998	483	2825
Kong	2015	EmCS	NC	Multiple	At delivery	26	140	555	3683
Larson	1995	CS	NC	All	At delivery	200	2317	624	5424
Larson	1995	CS	NC	Single	At delivery	162	2029	662	5712
Larson	1995	CS	NC	Multiple	At delivery	38	288	786	7453
Mastrobattista	2005	CSFD	NC	All	At delivery	8	775	68	3583
Mastrobattista	2005	CSFD	NC	Single	At delivery	3	688	73	3670
Mastrobattista	2005	CSFD	NC	Multiple	At delivery	5	79	71	4279
Miser	1992	CS	NC	All	At delivery	17	150	60	479
Nkwabong	2018	CS	NC	All	At delivery	30	84	6	222
Ogueh	2006	CS	NC	All	At delivery	912	12805	5347	38789
Ogueh	2006	CS	NC	Tight	At delivery	61	2964	6259	48569
Peregrine	2005	CS	NC	All	At delivery	18	34	67	170
Peregrine	2005	CSFD	NC	All	At delivery	5	47	21	216
Rogers	2003	CS	NC	All	At delivery	4	62	4	62
Rogers	2003	CS	NC	Tight	At delivery	2	31	6	93
Rogers	2003	CS	NC	Loose	At delivery	2	31	6	93
Schaffer	2005	CS	NC	All	At delivery	405	3583	1123	6591
Schaffer	2005	CS	NC	Single	At delivery	307	3006	1221	7168
Schaffer	2005	CS	NC	Multiple	At delivery	98	577	1430	9597
Sheiner	2006	CS	NC	All	At delivery	2805	21587	18024	123902
Shiva Kumar	2017	CS	NC	All	At delivery	76	144	160	620
Shiva Kumar	2017	CS	NC	Single	At delivery	36	88	200	676
Shiva Kumar	2017	CS	NC	Multiple	At delivery	40	56	196	708
Shrestha	2007	CS	NC	All	At delivery	24	93	122	273
Singh	2008	Primary C-section	NC	All	At delivery	6	59	34	251
Singh	2008	Primary C-section	NC	Tight	At delivery	4	13	36	297
Singh	2008	Primary C-section	NC	Loose	At delivery	2	46	38	264
Singh	2008	Repeat C-section	NC	All	At delivery	1	64	36	249
Singh	2008	Repeat C-section	NC	Tight	At delivery	0	17	37	296
Singh	2008	Repeat C-section	NC	Loose	At delivery	1	47	36	266
Vintzileos	1992	CS	NC	All	At delivery	46	39	283	150
Wang	2016	EmCS	NC	All	At delivery	56	643	37	1015
Weiner	2015	EmCS	NC	All	At delivery	146	99	384	431
									6151
						Quality assessment
Begum	2011	CS	NC	One v none	At delivery	Fair	14	119	459
Begum	2011	CS	NC	Multiple v none	At delivery	Fair	7	12	459
Begum	2011	CS	NC	Multiple v all	At delivery	Fair	7	12	473
Jauniaux	1995	CS	NC	One v none	At delivery	Fair	18	267	29
Jauniaux	1995	CS	NC	Multiple v none	At delivery	Fair	33	232	29
Jauniaux	1995	CS	NC	Multiple v all	At delivery	Fair	33	232	47
Kong	2015	EmCS	NC	One v none	At delivery	Fair	98	998	457
Kong	2015	EmCS	NC	Multiple v none	At delivery	Fair	26	140	457
Kong	2015	EmCS	NC	Multiple v all	At delivery	Fair	26	140	555
Larson	1995	CS	NC	One v none	At delivery	Good	162	2029	624
Larson	1995	CS	NC	Multiple v none	At delivery	Good	38	288	624
Larson	1995	CS	NC	Multiple v all	At delivery	Good	38	288	786
Mastrobattista	2005	EmCS	NC	One v none	At delivery	Good	3	688	68
Mastrobattista	2005	EmCS	NC	Multiple v none	At delivery	Good	5	79	68
Mastrobattista	2005	EmCS	NC	Multiple v all	At delivery	Good	5	79	71
Schaffer	2005	CS	NC	One v none	At delivery	Fair	307	3006	1123
Schaffer	2005	CS	NC	Multiple v none	At delivery	Fair	98	577	1123
Schaffer	2005	CS	NC	Multiple v all	At delivery	Fair	98	577	1430
Shiva Kumar	2017	CS	NC	One v none	At delivery	Fair	36	88	160
Shiva Kumar	2017	CS	NC	Multiple v none	At delivery	Fair	40	56	160
Shiva Kumar	2017	CS	NC	Multiple v all	At delivery	Fair	40	56	196
Alnakash	2018	CS	NC	Tight	At delivery	6	1	7	68
Alnakash	2018	CS	NC	Loose	At delivery	10	58	7	68
Begum	2011	CS	NC	Tight	At delivery	17	89	459	1035
Begum	2011	CS	NC	Loose	At delivery	4	42	459	1035
Dhar	1995	LsCS for FD	NC	Tight	At delivery	11	59	17	339
Dhar	1995	LsCS for FD	NC	Loose	At delivery	7	101	17	339
Gupta	2018	CS	NC	Tight	At delivery	30	35	138	398
Gupta	2018	CS	NC	Loose	At delivery	23	67	138	398
Ogueh	2006	CS	NC	Tight	At delivery	61	2964	5347	49481
Rogers	2003	CS	NC	Tight	At delivery	2	31	4	95
Rogers	2003	CS	NC	Loose	At delivery	2	31	4	95
Singh	2008	Primary C-section	NC	Tight	At delivery	4	13	34	299
Singh	2008	Primary C-section	NC	Loose	At delivery	2	46	34	268
Abdallah	2018	NICU admission	NC	3/4 sides of neck	At delivery	6	86	9	316
Alnakash	2018	NICU admission	NC	3/4 sides of neck	At delivery	14	61	8	67
Alnakash	2018	NICU admission	NC	Tight	At delivery	4	3	8	67
Alnakash	2018	NICU admission	NC	Loose	At delivery	10	58	8	67
D'Antona	1995	NICU admission	NC	All	At delivery	0	11	0	28
Ghosh	2008	NICU admission	NC	All	Ultrasound	4	65	5	128
Gonzalez-Quintero	2003	NICU admission	NC	cord around neck	Ultrasound	4	114	5	110
Gupta	2018	NICU admission	NC	All	At delivery	12	152	26	510
Gupta	2018	NICU admission	NC	Tight	At delivery	12	53	26	510
Gupta	2018	NICU admission	NC	Loose	At delivery	0	99	26	510
Gupta	2018	NICU admission	NC	Single	At delivery	0	119	38	543
Gupta	2018	NICU admission	NC	Multiple	At delivery	12	33	26	641
Henry	2013	NICU admission	NC	All	At delivery	3466	58379	9292	148200
Henry	2013	NICU admission	NC	Tight	At delivery	956	13525	9292	148200
Henry	2013	NICU admission	NC	Loose	At delivery	2510	44854	9292	148200
Jauniaux	1995	NICU admission	NC	cord around neck	At delivery	59	491	34	516
Jauniaux	1995	NICU admission	NC	Single	At delivery	22	263	71	744
Jauniaux	1995	NICU admission	NC	Multiple	At delivery	37	228	56	779
Kong	2015	NICU admission	NC	All	At delivery	400	862	998	2144
Kong	2016	NICU admission	NC	Single	At delivery	350	746	1048	2260
Kong	2017	NICU admission	NC	Multiple	At delivery	50	116	1348	2890
Mastrobattista	2005	NICU admission	NC	All	At delivery	40	735	162	3489
Mastrobattista	2005	NICU admission	NC	Single	At delivery	36	655	166	3569
Mastrobattista	2005	NICU admission	NC	Multiple	At delivery	4	80	198	4144
Narang	2014	NICU admission	NC	All	At delivery	23	77	3	47
Peregrine	2005	NICU admission	NC	All	At delivery	5	47	20	217
Schaffer	2005	NICU admission	NC	All	At delivery	135	3845	278	7444
Schaffer	2005	NICU admission	NC	Single	At delivery	109	3196	304	8093
Schaffer	2005	NICU admission	NC	Multiple	At delivery	26	649	387	10640
Shrestha	2007	NICU admission	NC	All	At delivery	29	88	73	322
						Quality assessment
Gupta	2018	NICU admission	NC	One v none	At delivery	Good	0	119	26
Gupta	2018	NICU admission	NC	Multiple v none	At delivery	Good	12	33	26
Gupta	2018	NICU admission	NC	Multiple v all	At delivery	Good	12	33	26
Jauniaux	1995	NICU admission	NC	One v none	At delivery	Fair	22	263	34
Jauniaux	1995	NICU admission	NC	Multiple v none	At delivery	Fair	37	228	34
Jauniaux	1995	NICU admission	NC	Multiple v all	At delivery	Fair	37	228	56
Kong	2016	NICU admission	NC	One v none	At delivery	Fair	350	746	998
Kong	2016	NICU admission	NC	Multiple v none	At delivery	Fair	50	116	998
Kong	2016	NICU admission	NC	Multiple v all	At delivery	Fair	50	116	1348
Mastrobattista	2005	NICU admission	NC	One v none	At delivery	Good	36	655	162
Mastrobattista	2005	NICU admission	NC	Multiple v none	At delivery	Good	4	80	162
Mastrobattista	2005	NICU admission	NC	Multiple v all	At delivery	Good	4	80	198
Schaffer	2005	NICU admission	NC	One v none	At delivery	Fair	109	3196	278
Schaffer	2005	NICU admission	NC	Multiple v none	At delivery	Fair	26	649	278
Schaffer	2005	NICU admission	NC	Multiple v all	At delivery	Fair	26	649	387
Alnakash	2018	Apgar <7	5 min	All	At delivery	3	72	2	73
Alnakash	2018	Apgar <7	5 min	Tight	At delivery	2	5	2	73
Alnakash	2018	Apgar <7	5 min	Loose	At delivery	1	67	2	73
Alnakash	2018	Apgar <7	1 min	All	At delivery	17	58	8	67
Alnakash	2018	Apgar <7	1 min	Tight	At delivery	5	2	8	67
Alnakash	2018	Apgar <7	1 min	Loose	At delivery	12	56	8	67
D'Antona	1995	Apgar <7	5 min	All	At delivery	0	11	0	28
D'Antona	1995	Apgar <6	1 min	All	At delivery	1	10	1	27
Dhar	1995	Apgar <7	1 min	All	At delivery	50	128	30	326
Dhar	1995	Apgar <7	1 min	Tight	At delivery	43	27	30	326
Dhar	1995	Apgar <7	1 min	Loose	At delivery	7	101	30	326
Ghosh	2008	Apgar <7	1 min	All	Ultrasound	5	64	6	127
Ghosh	2008	Apgar <7	5 min	All	Ultrasound	2	67	0	133
Gonzalez-Quintero	2003	Apgar <7	5 min	All	Ultrasound	9	109	6	109
Gupta	2018	Apgar <7	5 min	All	At delivery	2	162	2	534
Gupta	2018	Apgar <7	5 min	Tight	At delivery	2	63	2	534
Gupta	2018	Apgar <7	5 min	Loose	At delivery	0	99	2	534
Gupta	2018	Apgar <7	5 min	Single	At delivery	0	119	4	577
Gupta	2018	Apgar <7	5 min	Multiple	At delivery	2	43	2	653
Gupta	2018	Apgar <7	1 min	All	At delivery	10	154	17	519
Gupta	2018	Apgar <7	1 min	Tight	At delivery	10	55	17	519
Gupta	2018	Apgar <7	1 min	Loose	At delivery	0	99	17	519
Gupta	2018	Apgar <7	1 min	Single	At delivery	0	119	27	554
Gupta	2018	Apgar <7	1 min	Multiple	At delivery	10	35	17	638
Hashimoto	2003	Apgar <7	1 min	All	At delivery	6	41	4	116
Jauniaux	1995	Apgar <7	5 min	All	At delivery	19	531	12	538
Jauniaux	1995	Apgar <7	5 min	Single	At delivery	7	278	24	791
Jauniaux	1995	Apgar <7	5 min	Multiple	At delivery	12	253	19	816
Jauniaux	1995	Apgar <7	1 min	All	At delivery	82	468	49	501
Jauniaux	1995	Apgar <7	1 min	Single	At delivery	32	253	99	716
Jauniaux	1995	Apgar <7	1 min	Multiple	At delivery	50	215	81	754
Kobayashi	2015	Apgar <7	1 min	All	At delivery	41	1410	80	4653
Kobayashi	2015	Apgar <7	5 min	All	At delivery	6	1445	9	4724
Kong	2015	Apgar <7	5 min	All	At delivery	1	1261	2	3140
Kong	2015	Apgar <7	5 min	Single	At delivery	1	1095	2	3306
Kong	2015	Apgar <7	5 min	Multiple	At delivery	0	166	3	4235
Kong	2015	Apgar <7	1 min	All	At delivery	16	1246	28	3114
Kong	2015	Apgar <7	1 min	Single	At delivery	13	1083	31	3277
Kong	2015	Apgar <7	1 min	Multiple	At delivery	3	163	41	4197
Larson	1995	Apgar <7	5 min	All	At delivery	47	2470	101	5947
Larson	1995	Apgar <7	5 min	Single	At delivery	42	2149	106	6268
Larson	1995	Apgar <7	5 min	Multiple	At delivery	5	321	143	8096
Lipitz	1993	Apgar <7	5 min	Multiple	At delivery	4	1012	20	2831
Miser	1992	Apgar <7	1 min	All	At delivery	14	153	25	514
Miser	1992	Apgar <7	5 min	All	At delivery	2	165	5	534
Mastrobattista	2005	Apgar <7	5 min	All	At delivery	9	766	33	3618
Mastrobattista	2005	Apgar <7	5 min	Single	At delivery	9	682	33	3702
Mastrobattista	2005	Apgar <7	5 min	Multiple	At delivery	0	84	41	4301
Onderoglu	2008	Apgar <7	1 min	Multiple	At delivery	9	23	15	145
Peregrine	2005	Apgar <7	1 min	All	At delivery	7	45	25	212
Peregrine	2005	Apgar <7	5 min	All	At delivery	0	52	3	234
Purola	1968	Apgar <7	5 min	All	At delivery	19	353	30	1205
Schaffer	2005	Apgar <7	1 min	All	At delivery	413	3567	402	7320
Schaffer	2005	Apgar <7	1 min	Single	At delivery	336	2972	479	7915
Schaffer	2005	Apgar <7	1 min	Multiple	At delivery	77	595	738	10292
Schaffer	2005	Apgar <7	5 min	All	At delivery	33	3947	58	7664
Schaffer	2005	Apgar <7	5 min	Single	At delivery	4	3278	87	8333
Schaffer	2005	Apgar <7	5 min	Multiple	At delivery	29	669	62	10942
Sheiner	2006	Apgar <7	1 min	All	At delivery	1171	23221	6245	135681
Sheiner	2006	Apgar <7	5 min	All	At delivery	122	24270	993	140933
Shrestha	2007	Apgar <7	1 min	All	At delivery	29	88	58	337
Shrestha	2007	Apgar <7	5 min	All	At delivery	3	114	8	387
Singh	2008	Apgar <7	1 min	All	At delivery	5	60	15	270
Singh	2008	Apgar <7	1 min	Tight	At delivery	4	13	15	270
Singh	2008	Apgar <7	1 min	Loose	At delivery	1	47	15	270
Singh	2008	Apgar <7	5 min	All	At delivery	2	63	4	281
Singh	2008	Apgar <7	5 min	Tight	At delivery	1	16	4	281
Singh	2008	Apgar <7	5 min	Loose	At delivery	0	48	4	281
Vintzileios	1992	Apgar <7	1 min	All	At delivery	24	63	141	292
Vintzileios	1992	Apgar <7	5 min	All	At delivery	5	82	47	386
Wang	2016	Apgar <7	1 min	All	At delivery	9	688	4	1048
Wang	2016	Apgar <7	5 min	All	At delivery	1	696	2	1050
APGAR SCORES
Gupta	2018	Apgar <7	5 min	One v none	At delivery	Good	0	119	2
Gupta	2018	Apgar <7	5 min	Multiple v none	At delivery	Good	2	43	2
Gupta	2018	Apgar <7	5 min	Multiple v all	At delivery	Good	2	43	2
Jauniaux	1995	Apgar <7	5 min	One v none	At delivery	Fair	7	278	12
Jauniaux	1995	Apgar <7	5 min	Multiple v none	At delivery	Fair	12	253	12
Jauniaux	1995	Apgar <7	5 min	Multiple v all	At delivery	Fair	12	253	19
Kong	2015	Apgar <7	5 min	One v none	At delivery	Fair	1	1095	2
Kong	2015	Apgar <7	5 min	Multiple v none	At delivery	Fair	0	166	2
Kong	2015	Apgar <7	5 min	Multiple v all	At delivery	Fair	0	166	3
Larson	1995	Apgar <7	5 min	One v none	At delivery	Good	42	2149	101
Larson	1995	Apgar <7	5 min	Multiple v none	At delivery	Good	5	321	101
Larson	1995	Apgar <7	5 min	Multiple v all	At delivery	Good	5	321	143
Lipitz	1993	Apgar <7	5 min	Multiple v all	At delivery	Good	4	1012	20
Mastrobattista	2005	Apgar <7	5 min	One v none	At delivery	Good	9	682	33
Mastrobattista	2005	Apgar <7	5 min	Multiple v none	At delivery	Good	0	84	33
Mastrobattista	2005	Apgar <7	5 min	Multiple v all	At delivery	Good	0	84	41
Schaffer	2005	Apgar <7	5 min	One v none	At delivery	Fair	4	3278	58
Schaffer	2005	Apgar <7	5 min	Multiple v none	At delivery	Fair	29	669	58
Schaffer	2005	Apgar <7	5 min	Multiple v all	At delivery	Fair	29	669	62
Gupta	2018	Apgar <7	1 min	One v none	At delivery	Good	0	119	17
Gupta	2018	Apgar <7	1 min	Multiple v none	At delivery	Good	10	35	17
Gupta	2018	Apgar <7	1 min	Multiple v all	At delivery	Good	10	35	17
Jauniaux	1995	Apgar <7	1 min	One v none	At delivery	Fair	32	253	49
Jauniaux	1995	Apgar <7	1 min	Multiple v none	At delivery	Fair	50	215	49
Jauniaux	1995	Apgar <7	1 min	Multiple v all	At delivery	Fair	50	215	81
Kong	2015	Apgar <7	1 min	One v none	At delivery	Fair	13	1083	28
Kong	2015	Apgar <7	1 min	Multiple v none	At delivery	Fair	3	163	28
Kong	2015	Apgar <7	1 min	Multiple v all	At delivery	Fair	3	163	41
Onderoglu	2008	Apgar <7	1 min	Multiple v none	At delivery	Good	9	23	15
Schaffer	2005	Apgar <7	1 min	One v none	At delivery	Fair	336	2972	402
Schaffer	2005	Apgar <7	1 min	Multiple v none	At delivery	Fair	77	595	402
Schaffer	2005	Apgar <7	1 min	Multiple v all	At delivery	Fair	77	595	738
BW
Hashimoto	2003	BW <2500g	NC	All	At delivery	4	43	2	118
Henry	2013	BW<1500g	NC	All	At delivery	254	61591	1751	155741
Lipitz	1993	BW <2500g	NC	cord 2+ times around neck	At delivery	69	947	311	2540
Miser	1992	Birthweight <2500g	NC	All	At delivery	6	161	19	520
Purola	1968	BW<2500g	NC	All	At delivery	19	412	92	1457
SGA/IUGR
Carey	2003	IUGR (not defined)	NC	All	At delivery	47	3707	198	9304
Dhar	1995	SFD (-1SD)	NC	All	At delivery	31	147	36	320
Ghosh	2008	SGA (not defined)	NC	All	Ultrasound	2	67	1	132
Miser	1992	IUGR/SGA (not defined)	NC	All	At delivery	5	162	10	529
Onderoglu	2008	IUGR/SGA (not defined)	NC	cord around neck	At delivery	24	136	20	140
Tantbirojn	2009	IUGR (<10th centile)	NC	All	At delivery	13	46	42	431
Vintzileos	1992	IUGR (not defined)	NC	All	At delivery	4	83	28	405
Wang	2016	SGA (<10th centile)	NC	All	At delivery	72	595	63	989
PTB
Gonzalez-Quintero	2003	PTB	NC	cord around neck	Ultrasound	25	93	13	102
Nkwabong	2018	PTD <37w				8	106	19	209
Vintzileos	1992	PTD	NC		At birth	56	29	323	60

## Sheet: Abnormal characteristics
Abnormal characteristics of umbilical cord
True knot
First author	Year	Abnormality	Definition	Measured using	num	denom
Adesina	2004	True knot	not defined	at delivery	62	428	false knots may be included
Aibar	2012	True knot	not defined	at delivery	77	29530
Airas	2002	True knot		at delivery	288	23027
Aviram	2016	True knot	not defined	at delivery	173	37856
Balkawade	2012	True knot		at delivery	16	1000
Bjoro	1981	True knot	not defined	at delivery	9	773
Blickstein	1987	True knot	not defined	at delivery	57	4650
Bohiltea	2016	True knot		at delivery	133	18500
Collins	2000	True knot		ultrasound	4	1064
Collins	2000	True knot		at delivery	16	1064
Guzikowski	2014	True knot		at delivery	10	2864
Guzikowski	2014	True knot		ultrasound	4	unclear how many had US
Hershkovitz	2001	True knot		at delivery	841	69139
Kahana	2014	True knot	not stated	at delivery	1344	121227
Lehtonen	2017	True knot	ReCoDe 'constricting loop or knot'	at delivery	16	98
Linde	2018	True knot		at delivery	11271	856300
Lipitz	1993	True knot	not stated	at delivery	24	1016
McLennan	1988	True knot		at delivery	6	1115
Olaya	2018	True knot		at delivery	3	434
Raisanen	2013	True knot		at delivery	313	24456
Rayburn	1981	True knot		unknown	5	536
Salge	2017	True knot		at delivery	3	265
Shiva Kumar	2017	True knot		at delivery	33	1000
Sornes	2000	True knot	Any knot	at delivery	216	22012
Sornes	2000	True knot	1 knot	at delivery	202	22012
Sornes	2000	True knot	2 knots	at delivery	14	22012
Stanek	2016	True knot		at delivery	27	5634
Suzuki	2012	True knot		at delivery	52	10453
Tantbirojn	2009	True knot			33	224
Weiner	2015	True knot		at delivery	22	1060
Yadav	2013	True knot		at delivery	2	200
Coiling
First author	Year	Type	Time	num	denom
Adesina	2004	Hypocoiling	At birth	42	428
Adesina	2004	Hypercoiling	At birth	41	428
Sharma	2012	Hypocoiling	Antenatal	94	600
Sharma	2012	Hypercoiling	Antenatal	52	600
Chitra	2012	Hypocoiling	At birth	117	1000
Chitra	2012	Hypercoiling	At birth	100	1000
de Laat	2006	Hypocoiling	At birth	142	885
de Laat	2006	Hypercoiling	At birth	59	885
de Laat	2007	Hypocoiling	At birth	101	565
de Laat	2007	Hypercoiling	At birth	76	565
de Laat	2006	Hypocoiling	Antenatal US	7	81
de Laat	2006	Hypercoiling	Antenatal US	6	81
Devaru	2012	Hypocoiling	At birth	12	100
Devaru	2012	Hypercoiling	At birth	15	100
Ercal	1996	Hypocoiling	At birth	30	147
Ercal	1996	Hypercoiling	At birth	30	147
Ezimokhai	2000	Hypocoiling	At birth	62	657
Ezimokhai	2000	Hypercoiling	At birth	68	657
Tripathy	2014	Hypocoiling	At birth	11	102
Tripathy	2014	Hypercoiling	At birth	10	102
Jessop	2014	Hypocoiling	At birth	108	1082
Jessop	2014	Hypercoiling	At birth	108	1082
Kashanian	2006	Hypocoiling	At birth	78	699
Kashanian	2006	Hypercoiling	At birth	87	699
Machin	2000	Hypercoiling	At birth	275	1329
Machin	2000	Hypocoiling	At birth	180	1329
Mittal	2015	Hypocoiling	Antenatal	18	200
Mittal	2015	Hypercoiling	Antenatal	20	200
Ndolo	2017	Hypocoiling	Antenatal	45	430
Ndolo	2017	Hypercoiling	Antenatal	61	430
Olaya-C	2018	Hypocoiling	At birth	24	434
Olaya-C	2018	Hypercoiling	At birth	153	434
Peng	2006	Hypercoiling	At birth	6	139
Qin	2002	Hypocoiling	At birth	55	374
Qin	2002	Hypercoiling	At birth	52	374
Rana	1995	Hypocoiling	Antenatal	63	635
Rana	1995	Hypercoiling	Antenatal	63	635
Stanek	2016	Hypocoiling	At birth	120	5634
Stanek	2016	Hypercoiling	At birth	310	5634
Strong	1994	Hypercoiling	At birth	6	100
Strong	1994	Hypocoiling	At birth	10	100
Entanglement
First author	Year	Type	Definition	Measured by	num	denom
Adesina	2004	Cord around trunk	Cord around trunk	not stated	36	428
Adinma	1990	Limb or trunk only			13	1030
Adinma	1990	Neck and limb or trunk			5	1030
Adinma	1990	Entanglement	All		210	1030
Adinma	1990	All (included nuchal)	Tight (cut before end of delivery)		89	1030
Adinma	1990	All (included nuchal)	Loose (easily unlooped)		114	1030
Joshi	2017	Cord around trunk			3	506
Joshi	2017	Cord around limb			1	506
Linde	2018	Entanglement			176951	856227
Miser	1996	Entanglement	Hand or body		13	706
Olaya	2018	Entanglement	Cord tangles in fetal body parts	At birth	8	434
Sornes	1995	Entanglement	any body part		2890	11201
Stanek	2016	Entanglement			41	5634
Weiner	2015	Cord around limb	Single		6	530
Weiner	2015	Cord around limb	Multiple		1	530
Weiner	2015	Cord around trunk	Single		9	530
Weiner	2015	Cord around trunk	Multiple		2	530
					180392	864789
limb/trunk entanglements only
Adinma	1990	Limb or trunk only			13	1030
Joshi	2017	Cord around limb			1	506
Miser	1996	Entanglement	Hand or body		13	706
Weiner	2015	Cord around limb	all limbs, trunks		18	530
Cord prolapse
First author	Year	Abnormality	Definition	num	denom
Algreisi	2016	Cord prolapse		57	14873
Balkawade	2012	Cord prolapse		8	1000
Behbehani	2016	Cord prolapse		16126	10040416
Brant	1966	Cord prolapse		75	24084
Caspi	1983	Cord prolapse	delivery of a portion of the cord prior to delivery of the infant	127	32257
Dilbaz	2006	Cord prolapse		80	16874
Enakpene	2006	Cord prolapse		78	16596
Gabbay-Benziv	2014	Cord prolapse		37	33500
Gibbons	2014	Cord prolapse		1424	409473
Hehir	2017	Cord prolapse		307	156130
Hershkovitz	2001	Cord prolapse		226	69139
Kahana	2004	Cord prolapse	not stated	456	121227
Miser	1996	Cord prolapse		3	706
Rayburn	1981	Cord prolapse		4	536
Shiva Kumar	2017	Cord prolapse		10	1000
Stanek	2016	Cord prolapse		23	5634
Suzuki	2012	Cord prolapse		15	10453
Usta	1999	Cord prolapse		87	36500
Uygur	2002	Cord prolapse		77	32457
Winch	1961	Cord prolapse		54	48885
Yadav	2013	Cord prolapse		5	200
				19222	11057067

## Sheet: Frequency of adverse outcomes
Long cord
First author	Year	Adverse outcome measured (and definition)	Threshold	Number of abnormalities in adverse outcome	Number of adverse outcome measured	Total number of cord abnormalities	Total number of pregnancies		these are totals - need to be converted
Algreisi	2016	NICU admission	>80cm	14	384	379	14968
Algreisi	2016	APGAR score <7 at 1min	>80cm	57	1251	379	14968
Algreisi	2016	instrumental delivery	>80cm	28	1116	379	14968
Algreisi	2016	c/s rate	>80cm	33	1912	379	14968
Algreisi	2016	IUFD	>80cm	1	18	379	14968
Algreisi	2016	prolapse	>80cm	1	57	379	14968
Algreisi	2016	pH<7.0	>80cm	4	74	379	14968
Balkawade	2012	LSCS (lower segment CS)	>95cm	13	247	53	1000
Balkawade	2012	vaginal delivery	>95cm	40	752	53	1000
Linde	2018	BW<10th centile	>90th centile	5039	78449	70564	796630	from table 1
Linde	2018	EmCS	>90th centile	4737	73116	69062	797096	from table 3
Linde	2018	NICU admission	>90th centile	5978	61713	69062	797096	from table 3
Linde	2018	IUFD	>90th centile	501	2864	69062	797096	from table 3
Linde	2018	PTB	>90th centile	3957	42510	69062	797096	from table 3
Linde	2018	APGAR score <7 at 5min	>90th centile	2248	21837	69062	797096	from table 3
Shiva Kumar	2017	Stillbirth	>95cm	6	58	16	920
Shiva Kumar	2017	Apgar <7 at 1 min	>95cm	38	26	196	740
Suzuki	2012	Apgar score <7 at 5 min	>74cm	1	27	548	10453
Suzuki	2012	Apgar score <7 at 1 min	>74cm	14	157	548	10453
Suzuki	2012	SGA	>74cm	42	892	548	10453
Suzuki	2012	IUFD	>74cm	0	5	548	10453
Yadav	2013	BW<2500g	>60cm	22	55	80	200
short cord
Algreisi	2016	NICU admission		59	384	987	14968
Algreisi	2016	APGAR score <7 at 1min		123	1251	987	14968
Algreisi	2016	instrumental delivery		76	1116	987	14968
Algreisi	2016	CS		216	1912	987	14968
Algreisi	2016	IUFD		5	18	987	14968
Algreisi	2016	prolapse		0	57	987	14968
Algreisi	2016	pH<7.0		3	74	987	14968
Balkawade	2012	LSCS (lower segment CS)	>45cm	24	247	59	1000
Balkawade	2012	vaginal delivery	>45cm	34	752	59	1000
Linde	2018	BW<10th centile	<10th centile	11842	78449	69211	796630	from table 1
Linde	2018	EmCS	<10th centile	9961	73116	69211	797096	from table 3
Linde	2018	NICU admission	<10th centile	5847	61713	69211	797096	from table 3
Linde	2018	IUFD	<10th centile	325	2864	69211	797096	from table 3
Linde	2018	PTB	<10th centile	3287	42510	69211	797096	from table 3
Linde	2018	APGAR score <7 at 5min	<10th centile	2186	21387	69211	797096	from table 3
Shiva Kumar	2017	Stillbirth	<45cm	4	68	18	910
Shiva Kumar	2017	Apgar <7 at 1 min	<45cm	24	48	210	718
Suzuki	2012	Apgar score <7 at 5 min	<38cm	68	27	96	10453
Suzuki	2012	Apgar score <7 at 1 min	<38cm	1	157	96	10453
Suzuki	2012	SGA	<38cm	12	892	96	10453
Suzuki	2012	IUFD	<38cm	0	5	96	10453
Yadav	2013	BW<2500g	<50cm	5	55	20	200
Yamamoto	2016	CS	10th centile, <43cm	560	3004	3150	19543
Yamamoto	2016	SGA	10th centile, <43cm	424	2021	3150	19543
Yamamoto	2016	Apgar <7 at 5 min	10th centile, <43cm	30	136	3150	19543
cord entanglement
Linde	2018	pre-term birth	type of entanglement not specified	6695	46779	176957	856300
Linde	2018	emergency caesarean	type of entanglement not specified	9880	78817	176957	856300
Linde	2018	caesarean deivery	type of entanglement not specified	14127	128876	176957	856300
Linde	2018	perinatal death term	type of entanglement not specified	530	1691	176957	856300
Linde	2018	perinatal death preterm	type of entanglement not specified	370	2784	6695	856300
Linde	2018	intrauterine death rerm	type of entanglement not specified	437	1299	170262	856300
Linde	2018	intrauterine death preterm	type of entanglement not specified	326	2104	6695	856300
Linde	2018	NICU admission term	type of entanglement not specified	9258	42510	170262	856300
Linde	2018	NICU admission preterm	type of entanglement not specified	3135	24738	6695	856300
Linde	2018	5 min APGAR score <7 term birth	type of entanglement not specified	4621	17105	170262	856300
Linde	2018	5 min APGAR score <7 pre term birth	type of entanglement not specified	773	6379	6695	856300

## Sheet: True knot outcomes
First author	Year	outcome			caseevents	casenonevents	controlevents	controlnonevents
Airas	2002	IUFD		at delivery	4	284	88	22939
Blickstein	1987	Stillbirth		at delivery	2	52	0	108
Bohiltea	2016	IUFD		at delivery	0	133	0	18367
Guzikowski	2014	Stillbirth		at delivery	1	9	1	2853
Linde	2018	IUFD		at delivery	141	11130	3262	841767
Linde	2018	Perinatal stillbirth		at delivery	156	11115	4163	845029
McLennan	1988	Stillbirth		at delivery	0	6	7	1102
Raisanen	2013	IUFD		at delivery	3	336	81	27097
Tantbirojn	2009	Stillbirth		at delivery	2	31	39	469
Airas	2002	Apgar <7 at 5 min		at delivery	8	280	450	22977
Blickstein	1987	Apgar <7 at 5 min		at delivery	3	51	0	108
Linde	2018	Apgar <7 at 5 min		at delivery	426	10845	23484	821871
Raisanen	2013	Apgar <7 at 5 min			18	322	734	26463
First author	Year	outcome			caseevents	casenonevents	controlevents	controlnonevents
Blickstein	1987	CS	all, no indications mentioned	at delivery	5	49	0	108
Hershkovitz	2001	CS	all, no indications mentioned	at delivery	130	711	7191	61107
Linde	2018	EmCS	indications not stated	at delivery	1076	10195	77741	767288
Raisanen	2013	EmCS	indications not stated	at delivery	37	303	2434	24763
Shiva Kumar	2017	LSCS	all, no indications mentioned	at delivery	8	25	228	739
Sornes	2000	CS	all, no indications mentioned	at delivery	24	192	2304	19492
Weiner	2015	EmCS	NRFHR as only indication	at delivery	18	4	512	526
Yadav	2013	LSCS	all, some indications for EmCS mentioned (FHR, cord prolapse, nuchal cord)	at delivery	0	2	30	48
Airas	2002	PTD			18	270	1423	21604
Linde	2018	PTD <37w			693	10578	46086	798943
Raisanen	2013	PTD			29	309	1612	25459
Airas	2002	NICU admission			26	262	1712	21315
Linde	2018	NICU			1067	10204	66181	778848
Raisanen	2013	NICU			46	294	2489	24708
Airas	2002	LBW	<2500g		18	270	1084	21943
Airas	2002	SGA	<10th percentile		24	264	2179	20848
Hershkovitz	2001	BW<2500g	<2500g		74	767	4818	63479
Hershkovitz	2001	SGA	<10th percentile		52	789	3939	64359
Linde	2018	SGA	<10th percentile		1151	8962	83013	761211
Raisanen	2013	LBW	<2500g		22	318	1288	25906
Raisanen	2013	SGA	<10th percentile		41	299	2739	24455
Tantbirojn	2009	IUGR	not stated		3	28	52	458
Airas	2002	Apgar <7 at 1 min			24	264	1185	21842
Raisanen	2013	Apgar <7 at 1 min			32	308	1465	25732

## Sheet: Coiling
hypocoiling													Mode of delivery for both types of coiling					controls are normocoiling only
	First author	Year	Type	Measured	outcome	definition	caseevents	casenonevents	controlevents	controlnonevents			First author	Year	Mode of delivery	CS	Coiling	Measured	caseevents	casenonevents	controlevents	controlnonevents				hypocoiling
	Bindu	2012	Hypocoiling	Antenatal	Preterm delivery (<37 wks)	<10th centile	45	49	12	494			Bindu	2012	CS	LSCS	Hypocoiling	Antenatal	25	69	36	418				First author	Year	Mode of delivery	caseevents	casenonevents	controlevents	controlnonevents
	Chitra	2012	Hypocoiling	Postnatal	Preterm delivery (<37 wks)	<10th centile	20	97	79	804			Chholak	2017	CS	LSCS	Hypocoiling	Postnatal	26	28	123	272				Chitra	2012	CS	15	93	117	1000
	De Laat	2007	Hypocoiling	Postnatal	Preterm delivery (<37 wks)	0.07	36	65	230	234			Chitra	2012	CS	ElCS excluded	Hypocoiling	Postnatal	15	78	61	722				Chitra	2012	Ins	24	172	117	1000
	De Laat	2006	Hypocoiling	Postnatal	Preterm delivery (<37 wks)	0.07	18	124	61	682			Chitra	2012	Ins		Hypocoiling	Postnatal	24	78	127	656				Mittal	2015	Ins	3	9	18	200
	Ezimokhai	2000	Hypocoiling	Postnatal	Preterm delivery (<37 wks)	0.17	7	55	63	562			Ezimokhai	2000	CS	EmCS	Hypocoiling	Postnatal	4	58	17	490				Mittal	2015	CS	2	9	18	200
	Jo	2011	Hypocoiling	Antenatal	Preterm delivery (<37 wks)	0.27	8	12	14	168			Ezimokhai	2000	Ins		Hypocoiling	Postnatal	2	60	22	505				Bindu	2012	LSCS	25	93	94	600
	Rana	1995	Hypocoiling	Postnatal	Preterm delivery (<37 wks)	0.065	10	53	82	490			Jo	2011	CS	EmCS	Hypocoiling	Antenatal	3	17	19	163				Predanic	2005	CS	11	88	31	294
	Sahoo	2015	Hypocoiling	Postnatal	Preterm delivery (<37 wks)	0.21	4	19	18	122			Mittal	2015	Ins		Hypocoiling	Postnatal	3	15	5	157				Predanic	2005	Ins	1	18	36	294
	Strong	1994	Hypocoiling	Postnatal	Preterm delivery (<37 wks)	0.1	1	9	7	83			Mittal	2015	CS	EmCS	Hypocoiling	Postnatal	2	16	5	157
	Tripathy	2014	Hypocoiling	Postnatal	Preterm delivery (<37 wks)	<10th centile	2	9	14	77			Patil	2013	CS	LSCS	Hypocoiling	Postnatal	16	7	55	101				hypercoiled
	Adesina	2018	Hypocoiling	Postnatal	Apgar <7 5 min	0.13	3	41	40	316			Sahoo	2015	CS	CSFD	Hypocoiling	Antenatal	14	9	40	100				First author	Year	Mode of delivery	caseevents	casenonevents	controlevents	controlnonevents
	Bindu	2012	Hypocoiling	Antenatal	Apgar <7 5 min	<10th centile	49	45	34	472																Chitra	2012	CS	17	93	100	1000
	Chholak	2017	Hypocoiling	Postnatal	Apgar <7 5 min	<10th centile	36	18	107	288																Chitra	2012	Ins	21	172	100	1000
	Chitra	2012	Hypocoiling	Postnatal	Apgar <6 5 min	<10th centile	10	107	41	842																Mittal	2015	Ins	1	9	20	200
	Devaru	2012	Hypocoiling	Postnatal	Apgar <7 5 min	<10th centile	12	0	61	27			Bindu	2012	CS	LSCS	Hypercoiling	Antenatal	32	20	36	418				Mittal	2015	CS	2	9	20	200
	De Laat	2006	Hypocoiling	Postnatal	Apgar <7 5 min	0.07	11	131	23	720			Chholak	2017	CS	LSCS	Hypercoiling	Postnatal	24	27	123	272				Bindu	2012	CS	32	93	52	600
	Ercal	1996	Hypocoiling	Postnatal	Apgar <7 5 min	<10th centile	26	4	13	104			Chitra	2012	CS	ElCS excluded	Hypercoiling	Postnatal	17	62	61	722				Predanic	2005	CS	6	88	27	294
	Ezimokhai	2000	Hypocoiling	Postnatal	Apgar <7 5 min	0.17	0	62	8	587			Chitra	2012	Ins		Hypercoiling	Postnatal	21	62	127	656
	Kashanian	2006	Hypocoiling	Postnatal	Apgar <7 5 min	0.17	15	63	28	593			Ezimokhai	2000	EmCS	EmCS	Hypercoiling	Postnatal	11	57	17	490
	Patil	2013	Hypocoiling	Postnatal	Apgar <7 5 min	0.06	7	16	19	137			Ezimokhai	2000	Ins		Hypercoiling	Postnatal	4	64	22	505
	Rana	1995	Hypocoiling	Postnatal	Apgar <7 5 min	0.065	2	61	14	558			Jo	2011	CS	EmCS	Hypercoiling	Antenatal	3	21	19	163
	Tripathy	2014	Hypocoiling	Postnatal	Apgar <7 5 min	<10th centile	6	5	21	70			Mittal	2015	Ins		Hypercoiling	Postnatal	1	19	5	157
													Mittal	2015	CS	EmCS	Hypercoiling	Postnatal	2	18	5	157
	Chholak	2017	Hypocoiling	Postnatal	Apgar <7 1 min	<10th centile	35	19	105	290			Patil	2013	CS	LSCS	Hypercoiling	Postnatal	8	13	55	101
	Devaru	2012	Hypocoiling	Postnatal	Apgar <4 1 min	<10th centile	12	0	23	65			Sahoo	2015	CS	CSFD	Hypercoiling	Antenatal	10	4	40	100
	Ercal	1996	Hypocoiling	Postnatal	Apgar <7 1 min	<10th centile	9	21	9	108
	Jessop	2014	Hypocoiling	Postnatal	Apgar <7 1 min	0.1	4	104	30	936
	Jo	2011	Hypocoiling	Antenatal	Apgar <7 1 min	0.27	6	14	31	151
	Mittal	2015	Hypocoiling	Postnatal	Poor Apgar score - <4 at 1 min, <7 at 5 min	0.26	0	18	2	180
	Adesina	2018	Hypocoiling	Postnatal	NICU admission	0.13	4	40	40	311
	Devaru	2012	Hypocoiling	Postnatal	NICU admission	<10th centile	4	8	14	74
	Gaikwad	2016	Hypocoiling	Postnatal	NICU admission	0.09	8	8	15	136
	Jessop	2014	Hypocoiling	Postnatal	NICU admission	0.1	5	103	61	913
	Jo	2011	Hypocoiling	Antenatal	NICU admission	0.27	6	14	12	170
	Mittal	2015	Hypocoiling	Postnatal	NICU admission	0.26	0	18	3	179
	Patil	2013	Hypocoiling	Postnatal	NICU admission	0.06	10	13	19	137
	Bindu	2012	Hypocoiling	Antenatal	Low birth weight (<2500g)	<10th centile	71	23	64	442
	Chholak	2017	Hypocoiling	postnatal	Low birth weight (<2500g)	<10th centile	12	42	107	288
	Chitra	2012	Hypocoiling	Postnatal	Low birth weight (<2500g)	<10th centile	37	74	201	649
	Gaikwad	2016	Hypocoiling	Postnatal	Low birth weight (<2500g)	0.09	12	4	19	132
	Jo	2011	Hypocoiling	Antenatal	Low birth weight (<2500g)	0.27	8	12	18	164
	Kashanian	2006	Hypocoiling	Postnatal	Low birth weight (<2500g)	0.17	7	71	33	588
	Mittal	2015	Hypocoiling	Postnatal	Low birth weight (<2500g)	0.26	3	15	9	173
	Tripathy	2014	Hypocoiling	Postnatal	Low birth weight (<2500g)	<10th centile	6	5	43	48
	Adesina	2018	Hypocoiling	Postnatal	SGA	0.13	1	43	36	315
	Chholak	2017	Hypocoiling	Postnatal	IUGR		0	54	1	394
	De Laat	2006	Hypocoiling	Antenatal	SGA	<10th centile	3	3	10	65
	Devaru	2012	Hypocoiling	Postnatal	IUGR	unclear - high incidence and was not part of inclusion criteria	1	11	47	41
	Ercal	1996	Hypocoiling	Postnatal	SGA	according to growth curve	1	29	5	112
	Ezimokhai	2000	Hypocoiling	Postnatal	FGR	<10th centile	1	61	7	588
	Gaikwad	2016	Hypocoiling	Postnatal	IUGR	0.09	11	5	12	139
	Jessop	2014	Hypocoiling	Postnatal	SGA	0.1	10	90	98	884
	Jo	2011	Hypocoiling	Antenatal	IUGR	0.27	4	16	17	165
	Machin	2000	Hypocoiling	Postnatal	IUGR		27	153	207	942
	Mittal	2015	Hypocoiling	Postnatal	IUGR	standard curves	0	18	3	176
	Ndolo	2017	Hypocoiling	Antenatal	SGA	<10th centile	3	42	42	343
	Patil	2013	Hypocoiling	Postnatal	IUGR	0.06	0	23	5	151
	Rana	1995	Hypocoiling	Postnatal	FGR	according to growth curve	4	59	29	543
	Strong	1994	Hypocoiling	Postnatal	IUGR	not defined	1	9	2	88
	De Laat	2007	Hypocoiling	Postnatal	IUFD	0.07	23	78	43	421
	De Laat	2006	Hypocoiling	Postnatal	IUFD	0.07	10	132	18	725
	Machin	2000	Hypocoiling	Postnatal	IUFD	0.1	63	117	171	978
	Devaru	2012	Hypocoiling	Postnatal	NND		1	11	2	86
	hypercoiling
	First author	Year		Measured	outcome	definition	caseevents	casenonevents	controlevents	controlnonevents
	Adesina	2018	Hypercoiling	Postnatal	Apgar <7 at 5 min	0.3	7	29	40	316
	Bindu	2012	Hypercoiling	Antenatal	Apgar <7 5 min	>90th	33	19	50	498
	Chholak	2017	Hypercoiling	Postnatal	Apgar <7 at 5 min	>90th	12	39	107	288
	Chitra	2012	Hypercoiling	Postnatal	Apgar <6 at 5 min	>90th	10	90	41	859
	De Laat	2006	Hypercoiling	Postnatal	Apgar <7 at 5 min	0.3	2	57	32	794
	Devaru	2012	Hypercoiling	Postnatal	Apgar <7 5 min	>90th	8	7	65	20
	Ercal	1996	Hypercoiling	Postnatal	Apgar <7 5 min	>90th	1	29	38	79
	Ezimokhai	2000	Hypercoiling	Postnatal	Apgar <7 5 min	0.37	1	67	7	582
	Kashanian	2006	Hypercoiling	Postnatal	Apgar <7 5 min	0.37	20	67	23	589
	Patil	2013	Hypercoiling	Postnatal	Apgar <7 5 min	0.48	2	19	19	137
	Rana	1995	Hypercoiling	Postnatal	Apgar <7 5 min	0.319	4	59	12	560
	Tripathy	2014	Hypercoiling	Postnatal	Apgar <7 5 min	>90th	3	7	24	68
	Chholak	2017	Hypercoiling	Postnatal	Apgar <7 1 min	>90th	12	39	105	290
	Devaru	2012	Hypercoiling	Postnatal	Apgar <4 at 1 min	>90th	1	14	34	51
	Ercal	1996	Hypercoiling	Postnatal	Apgar <7 at 1 min	>90th	1	29	17	100
	Jessop	2014	Hypercoiling	Postnatal	Apgar <7 at 1 min	0.32	17	91	235	739
	Jo	2011	Hypercoiling	Antenatal	Apgar <7 at 1 min	0.64	4	20	31	151
	Mittal	2015	Hypercoiling	Postnatal	Poor apgar score - 1min <4; 5mins <7	0.46	0	20	2	178
	Bindu	2012	Hypercoiling	Antenatal	Preterm delivery (<37 wks)	>90th	2	50	55	493
	Chitra	2012	Hypercoiling	Postnatal	Preterm delivery (<37 wks)	>90th	14	86	85	815
	De Laat	2007	Hypercoiling	Postnatal	Preterm delivery (<37 wks)	0.3	35	41	231	258
	De Laat	2006	Hypercoiling	Postnatal	Preterm delivery (<37 wks)	0.3	7	52	72	754
	Ezimokhai	2000	Hypercoiling	Postnatal	Preterm delivery (<37 wks)	0.37	10	58	60	529
	Jo	2011	Hypercoiling	Antenatal	Preterm delivery (<37 wks)	0.64	4	20	14	168
	Rana	1995	Hypercoiling	Postnatal	Preterm delivery (<37 wks)	0.319	21	42	71	501
	Sahoo	2015	Hypercoiling	Postnatal	Preterm delivery (<37 wks)	0.59	3	11	18	122
	Tripathy	2014	Hypercoiling	Postnatal	Preterm delivery (<37 wks)	>90th	5	5	11	81
	Adesina	2018	Hypercoiling	Postnatal	NICU admission	0.3	5	36	40	311
	Devaru	2012	Hypercoiling	Postnatal	NICU admission	>90th	3	12	15	70
	Gaikwad	2016	Hypercoiling	Postnatal	NICU admission	0.26	5	11	15	136
	Jessop	2014	Hypercoiling	Postnatal	NICU admission	0.32	5	103	61	913
	Jo	2011	Hypercoiling	Antenatal	NICU admission	0.64	0	24	12	170
	Mittal	2015	Hypercoiling	Postnatal	NICU admission	0.46	0	20	3	177
	Patil	2013	Hypercoiling	Postnatal	NICU admission	0.48	6	15	19	137
	Bindu	2012	Hypercoiling	Antenatal	Low birth weight (<2500g)	>90th	9	43	126	422
	Chholak	2017	Hypercoiling	Postnatal	Low birth weight (<2500g)	>90th	22	29	107	288
	Chitra	2012	Hypercoiling	Postnatal	Low birth weight (<2500g)	>90th	36	60	202	663
	Gaikwad	2016	Hypercoiling	Postnatal	Low birth weight (<2500g)	0.26	4	12	19	132
	Jo	2011	Hypercoiling	Postnatal	Low birth weight (<2500g)	0.64	4	20	18	164
	Kashanian	2006	Hypercoiling	Postnatal	Low birth weight (<2500g)	0.37	23	64	17	595
	Mittal	2015	Hypercoiling	Postnatal	Low birth weight (<2500g)	0.46	4	16	8	172
	Tripathy	2014	Hypercoiling	Postnatal	Low birth weight (<2500g)	>90th	8	2	41	51
	Adesina	2018	Hypercoiling	Postnatal	SGA	0.3	4	40	36	315
	Chholak	2017	Hypercoiling	Postnatal	IUGR	>90th	19	32	1	394
	De Laat	2006	Hypercoiling	Postnatal	SGA	0.3	11	48	82	744							Hypercoiling and SGA/IUGR - controls normocoiling only
	De Laat	2006	Hypercoiling	Antenatal	SGA	0.3	2	5	11	63							Adesina	2018	Postnatal	SGA	0.3	4	40	36	315	<10th centile
	De Laat	2007	Hypercoiling	Postnatal	SGA	0.3	18	58	87	402							Chholak	2017	Postnatal	IUGR	>90th	19	32	1	394	not defined
	Devaru	2012	Hypercoiling	Postnatal	IUGR	>90th	11	4	48	37							Devaru	2012	Postnatal	IUGR	>90th	11	4	36	37	unclear - high incidence and was not part of inclusion criteria
	Ercal	1996	Hypercoiling	Postnatal	SGA	>90th	2	28	5	112							Ercal	1996	Postnatal	SGA	>90th	2	28	5	112	according to growth curve
i	Ezimokhai	2000	Hypercoiling	Postnatal	FGR	0.37	3	65	5	584							Ezimokhai	2000	Postnatal	FGR	0.37	3	65	4	503	<10th centile
	Gaikwad	2016	Hypercoiling	Postnatal	IUGR	0.26	4	12	12	139							Gaikwad	2016	Postnatal	IUGR	0.26	4	12	12	139	not defined
	Jessop	2014	Hypercoiling	Postnatal	SGA	0.32	15	85	93	889							Jessop	2014	Postnatal	SGA	0.38	15	85	93	889	<10th centile
	Jo	2011	Hypercoiling	Antenatal	IUGR	0.64	6	18	17	165							Jo	2011	Antenatal	IUGR	0.64	6	18	17	165	not defined
	Machin	2000	Hypercoiling	Postnatal	IUGR	0.3	37	218	106	868							Machin	2000	Postnatal	IUGR	0.3	37	218	79	795	not defined
	Mittal	2015	Hypercoiling	Postnatal	IUGR	0.46	2	18	1	179							Mittal	2015	Postnatal	IUGR	0.46	2	18	1	161	standard curves
	Ndolo	2017	Hypercoiling	Antenatal	SGA	0.6	6	55	39	330							Ndolo	2017	Antenatal	SGA	0.6	6	55	36	288	<10th centile
	Patil	2013	Hypercoiling	Postnatal	IUGR	0.48	17	4	5	151							Patil	2013	Postnatal	IUGR	0.48	17	4	5	151	not defined
	Rana	1995	Hypercoiling	Postnatal	FGR	0.319	5	58	28	544
	De Laat	2007	Hypercoiling	Postnatal	IUFD	0.3	16	60	50	439
	De Laat	2006	Hypercoiling	Postnatal	IUFD	0.3	3	56	25	801
	Machin	2000	Hypercoiling	Postnatal	IUFD	0.3	103	172	131	843
	Devaru	2012	Hypercoiling	Postnatal	NND		0	15	3	82
																	Hypocoiling and SGA/IUGR - controls normocoiling only
	IUFD and hypercoiling at >0.3 UCI - hypocoiling excluded from controls																Adesina	2018	Postnatal	SGA	0.13	1	43	36	315	<10th centile
	De Laat	2006	hypercoiling	Postnatal	IUFD	0.3	3	56	15	659							Chholak	2017	Postnatal	IUGR		0	54	1	394	not defined
	De Laat	2007	hypercoiling	Postnatal	IUFD	0.3	16	60	27	361							Devaru	2012	Postnatal	IUGR	unclear - high incidence and was not part of inclusion criteria	1	11	36	37	unclear - high incidence and was not part of inclusion criteria
	Machin	2000	hypercoiling	Postnatal	IUFD	0.3	103	172	68	806							Ercal	1996	Postnatal	SGA	according to growth curve	1	29	5	112	according to growth curve
	Sahoo	2015	Hypercoiling	Postnatal	IUFD	0.59	0	14	1	139							Ezimokhai	2000	Postnatal	FGR	<10th centile	1	61	4	503	<10th centile
																	Gaikwad	2016	Postnatal	IUGR	0.09	11	5	12	139	not defined
	De Laat	2006	Hypocoiling	Postnatal	IUFD	0.07	10	132	15	659							Jessop	2014	Postnatal	SGA	<10th centile	10	90	98	884	<10th centile
	De Laat	2007	Hypocoiling	Postnatal	IUFD	0.07	23	78	27	361							Jo	2011	Antenatal	IUGR	0.27	4	16	17	165	not defined
	Machin	2000	Hypocoiling	Postnatal	IUFD	0.1	63	117	68	806							Machin	2000	Postnatal	IUGR		27	153	79	795	not defined
	Sahoo	2015	Hypocoiling	Postnatal	IUFD	0.21	2	21	1	139							Mittal	2015	Postnatal	IUGR	standard curves	0	18	1	161	standard curves
	strong 1994 for fetal deaths in noncoiled cords?					mention non-coiling in paper?											Ndolo	2017	Antenatal	SGA	<10th centile	3	42	26	288	<10th centile
																	Patil	2013	Postnatal	IUGR	0.06	0	23	5	151	not defined
	PTD with controls as normocoiling only																Rana	1995	Postnatal	FGR	according to growth curve	4	59	29	543	according to growth curve
	Sharma	2012	Hypocoiling	Antenatal	Preterm delivery (<37 wks)	<10th centile	45	49	10	444							Strong	1994	Postnatal	IUGR	not defined	1	9	2	88	not defined
	Jo	2011	Hypocoiling	Antenatal	Preterm delivery (<37 wks)	0.27	8	12	14	168
	Chitra	2012	Hypocoiling	Postnatal	Preterm delivery (<37 wks)	<10th centile	20	97	65	718
	De Laat	2007	Hypocoiling	Postnatal	Preterm delivery (<37 wks)	0.07	36	65	125	263
	De Laat	2006	Hypocoiling	Postnatal	Preterm delivery (<37 wks)	0.07	29	113	72	612
	Ezimokhai	2000	Hypocoiling	Postnatal	Preterm delivery (<37 wks)	0.17	7	55	50	457
	Rana	1995	Hypocoiling	Postnatal	Preterm delivery (<37 wks)	0.065	10	53	61	448
	Sahoo	2015	Hypocoiling	Postnatal	Preterm delivery (<37 wks)	0.21	4	19	18	122
	Strong	1994	Hypocoiling	Postnatal	Preterm delivery (<37 wks)	0.1	1	9	7	83
	Tripathy	2014	Hypocoiling	Postnatal	Preterm delivery (<37 wks)	<10th centile	2	9	9	72
									total	2396
	Bindu	2012	Hypercoiling	Antenatal	Preterm delivery (<37 wks)	>90th	2	50	10	444
	Jo	2011	Hypercoiling	Antenatal	Preterm delivery (<37 wks)	0.64	4	20	14	168
	Chitra	2012	Hypercoiling	Postnatal	Preterm delivery (<37 wks)	>90th	14	86	65	718
	De Laat	2007	Hypercoiling	Postnatal	Preterm delivery (<37 wks)	0.3	35	41	125	263
	De Laat	2006	Hypercoiling	Postnatal	Preterm delivery (<37 wks)	0.3	9	50	72	612
	Ezimokhai	2000	Hypercoiling	Postnatal	Preterm delivery (<37 wks)	0.37	10	58	50	457
	Rana	1995	Hypercoiling	Postnatal	Preterm delivery (<37 wks)	0.319	21	42	61	448
	Sahoo	2015	Hypercoiling	Postnatal	Preterm delivery (<37 wks)	0.59	3	11	18	122
	Tripathy	2014	Hypercoiling	Postnatal	Preterm delivery (<37 wks)	>90th	5	5	9	72
									total	2275
	Apgar with controls as normocoiling only
	Bindu	2012	Hypocoiling	Antenatal	Apgar <7 5 min	<10th centile	49	45	11	444
	Adesina	2018	Hypocoiling	Postnatal	Apgar <7 5 min	0.13	3	41	40	316
	Chholak	2017	Hypocoiling	Postnatal	Apgar <7 5 min	<10th centile	36	18	107	288
	Chitra	2012	Hypocoiling	Postnatal	Apgar <6 5 min	<10th centile	10	107	31	752
	De Laat	2006	Hypocoiling	Postnatal	Apgar <7 5 min	0.07	11	131	21	683
	Devaru	2012	Hypocoiling	Postnatal	Apgar <7 5 min	<10th centile	12	0	20	53
	Ercal	1996	Hypocoiling	Postnatal	Apgar <7 5 min	<10th centile	26	4	12	75
	Ezimokhai	2000	Hypocoiling	Postnatal	Apgar <7 5 min	0.17	0	62	7	507
	Kashanian	2006	Hypocoiling	Postnatal	Apgar <7 5 min	0.17	15	63	8	526
	Patil	2013	Hypocoiling	Postnatal	Apgar <7 5 min	0.06	7	16	19	137
	Rana	1995	Hypocoiling	Postnatal	Apgar <7 5 min	0.065	2	61	10	499
	Tripathy	2014	Hypocoiling	Postnatal	Apgar <7 5 min	<10th centile	6	5	18	63
									total	3982
	Bindu	2012	Hypercoiling	Antenatal	Apgar <7 5 min	>90th	23	29	11	444
	Adesina	2018	Hypercoiling	Postnatal	Apgar <7 at 5 min	0.3	7	29	40	316
	Chholak	2017	Hypercoiling	Postnatal	Apgar <7 at 5 min	>90th	12	39	107	288
	Chitra	2012	Hypercoiling	Postnatal	Apgar <6 at 5 min	>90th	10	90	31	752
	De Laat	2006	Hypercoiling	Postnatal	Apgar <7 at 5 min	0.3	2	57	21	683
	Devaru	2012	Hypercoiling	Postnatal	Apgar <7 5 min	>90th	8	7	20	53
	Ercal	1996	Hypercoiling	Postnatal	Apgar <7 5 min	>90th	1	29	12	75
	Ezimokhai	2000	Hypercoiling	Postnatal	Apgar <7 5 min	0.37	1	67	7	507
	Kashanian	2006	Hypercoiling	Postnatal	Apgar <7 5 min	0.37	20	67	8	526
	Patil	2013	Hypercoiling	Postnatal	Apgar <7 5 min	0.48	2	19	19	137
	Rana	1995	Hypercoiling	Postnatal	Apgar <7 5 min	0.319	4	59	10	499
	Tripathy	2014	Hypercoiling	Postnatal	Apgar <7 5 min	>90th	3	7	18	63
									total	3969
	Chholak	2017	Hypercoiling	Postnatal	Apgar <7 1 min	>90th	12	39	105	290
	Ercal	1996	Hypercoiling	Postnatal	Apgar <7 at 1 min	>90th	1	29	8	79
	Jessop	2014	Hypercoiling	Postnatal	Apgar <7 at 1 min	0.32	3	105	27	849
	Chholak	2017	Hypocoiling	Postnatal	Apgar <7 1 min	<10th centile	35	19	105	290
	Ercal	1996	Hypocoiling	Postnatal	Apgar <7 1 min	<10th centile	9	21	8	79
	Jessop	2014	Hypocoiling	Postnatal	Apgar <7 1 min	0.1	4	104	27	849
	NICU
	Adesina	2018	Hypocoiling	Postnatal	NICU admission	0.13	4	40	40	311
	Devaru	2012	Hypocoiling	Postnatal	NICU admission	<10th centile	4	8	11	62
	Gaikwad	2016	Hypocoiling	Postnatal	NICU admission	0.09	8	8	15	136
	Jessop	2014	Hypocoiling	Postnatal	NICU admission	0.06	5	103	56	810
	Mittal	2015	Hypocoiling	Postnatal	NICU admission	0.26	0	18	3	159
	Patil	2013	Hypocoiling	Postnatal	NICU admission	0.06	10	13	19	137
	Adesina	2018	Hypercoiling	Postnatal	NICU admission	0.3	5	36	40	311
	Devaru	2012	Hypercoiling	Postnatal	NICU admission	>90th	3	12	11	62
	Gaikwad	2016	Hypercoiling	Postnatal	NICU admission	0.26	5	11	15	136
	Jessop	2014	Hypercoiling	Postnatal	NICU admission	0.38	5	103	56	810
	Mittal	2015	Hypercoiling	Postnatal	NICU admission	0.46	0	20	3	159
	Patil	2013	Hypercoiling	Postnatal	NICU admission	0.48	6	15	19	137
	LBW
	Bindu	2012	Hypocoiling	Antenatal	Low birth weight (<2500g)	<10th centile	71	23	64	442
	Jo	2011	Hypocoiling	Antenatal	Low birth weight (<2500g)	0.27	8	12	18	164
	Mittal	2015	Hypocoiling	Antenatal	Low birth weight (<2500g)	0.26	3	15	9	173
	Chholak	2017	Hypocoiling	postnatal	Low birth weight (<2500g)	<10th centile	12	42	107	288
	Chitra	2012	Hypocoiling	Postnatal	Low birth weight (<2500g)	<10th centile	37	74	201	649
	Gaikwad	2016	Hypocoiling	Postnatal	Low birth weight (<2500g)	0.09	12	4	19	132
	Kashanian	2006	Hypocoiling	Postnatal	Low birth weight (<2500g)	0.17	7	71	33	588
	Tripathy	2014	Hypocoiling	Postnatal	Low birth weight (<2500g)	<10th centile	6	5	43	48
	Bindu	2012	Hypercoiling	Antenatal	Low birth weight (<2500g)	>90th	9	43	126	422
	Jo	2011	Hypercoiling	Postnatal	Low birth weight (<2500g)	0.64	4	20	18	164
i	Mittal	2015	Hypercoiling	Postnatal	Low birth weight (<2500g)	0.46	4	16	8	172
	Chholak	2017	Hypercoiling	Postnatal	Low birth weight (<2500g)	>90th	22	29	107	288
	Chitra	2012	Hypercoiling	Postnatal	Low birth weight (<2500g)	>90th	36	60	202	663
	Gaikwad	2016	Hypercoiling	Postnatal	Low birth weight (<2500g)	0.26	4	12	19	132
	Kashanian	2006	Hypercoiling	Postnatal	Low birth weight (<2500g)	0.37	23	64	17	595
	Tripathy	2014	Hypercoiling	Postnatal	Low birth weight (<2500g)	>90th	8	2	41	51
	De Laat	2006	Hypocoiling	Antenatal	SGA	<10th centile		3	3	10	65
	Jo	2011	Hypocoiling	Antenatal	IUGR	0.27		4	16	17	165
	Ndolo	2017	Hypocoiling	Antenatal	SGA	<10th centile		3	42	42	343
	Adesina	2018	Hypocoiling	Postnatal	SGA	<10th centile	0.13	1	43	36	315
	Chholak	2017	Hypocoiling	Postnatal	IUGR	unclear	<10th	0	54	1	394
	Devaru	2012	Hypocoiling	Postnatal	IUGR	unclear	<10th	1	11	36	37
	Ercal	1996	Hypocoiling	Postnatal	SGA	<10th centile	<10th	1	29	5	112
	Ezimokhai	2000	Hypocoiling	Postnatal	FGR	<10th centile	0.17	3	59	4	503
	Gaikwad	2016	Hypocoiling	Postnatal	IUGR	unclear	0.09	11	5	12	139
	Jessop	2014	Hypocoiling	Postnatal	SGA	<10th centile	0.1	10	90	83	799
	Machin	2000	Hypocoiling	Postnatal	IUGR	unclear	0.1	27	153	79	795
	Mittal	2015	Hypocoiling	Postnatal	IUGR	<10th centile	0.26	0	18	1	161
	Patil	2013	Hypocoiling	Postnatal	IUGR	unclear	0.06	0	23	5	151
	Rana	1995	Hypocoiling	Postnatal	FGR	<10th centile	0.065	4	59	24	485
	Strong	1994	Hypocoiling	Postnatal	IUGR	unclear	0.1	1	9	2	88
	De Laat	2006	Hypercoiling	Antenatal	SGA		0.3	2	5	11	63
	Ndolo	2017	Hypercoiling	Antenatal	SGA		0.6	6	55	39	330
	Jo	2011	Hypercoiling	Antenatal	IUGR		0.64	6	18	17	165
	Adesina	2018	Hypercoiling	Postnatal	SGA	<10th centile	0.3	4	40	36	315
	Chholak	2017	Hypercoiling	Postnatal	IUGR	unclear	>90th	19	32	1	394
	Devaru	2012	Hypercoiling	Postnatal	IUGR	unclear	>90th	11	4	36	37
	Ercal	1996	Hypercoiling	Postnatal	SGA	<10th centile	>90th	2	28	5	112
	Ezimokhai	2000	Hypercoiling	Postnatal	FGR	<10th centile	0.37	1	67	4	503
	Gaikwad	2016	Hypercoiling	Postnatal	IUGR	unclear	0.26	4	12	12	139
	Jessop	2014	Hypercoiling	Postnatal	SGA	<10th centile	0.32	15	85	83	799
	Machin	2000	Hypercoiling	Postnatal	IUGR	unclear	0.3	37	238	79	795
	Mittal	2015	Hypercoiling	Postnatal	IUGR	<10th centile	0.46	2	18	1	161
	Patil	2013	Hypercoiling	Postnatal	IUGR	unclear	0.48	17	4	5	151
	Rana	1995	Hypercoiling	Postnatal	FGR	<10th centile	0.319	5	58	24	485
	De Laat	2006	Hypercoiling	Postnatal	SGA		0.3	11	48	82	744	<10th centile)
	De Laat	2007	Hypercoiling	Postnatal	SGA		0.3	18	58	87	402	<10th centile)
